# Supplementary material
Source: MDPI journal article supplement (https://www.mdpi.com/2076-0825/10/1/3)
Supplement: s1 [file s1]

**Original Manuscript ID:** actuators-1022095

**Original Article Title:** “A Damp Variable Sliding Mode Control Strategy for Electro-Hydrostatic Actuator”

**To:** actuators Academic Editor

Dear Academic Editor:

Many thanks for your profound suggestions to improve our paper. Modifications we have done are listed as follows:

For comment No.1, we remove the redundant part which you pointed out. Consequently, the quality of the figures are improved by re-configuring, which makes the revised manuscript looks more comfortable.

According to your second comment, we improve our writing English by resorting to the English editing service provided by MDPI, which significantly enhances the fluency of our paper.

Clean copies in word and pdf format can be found in enclosure. In the version with track changes, modified parts in line with comment No.1 are shown with grey highlight.

Hope that our revised manuscript is more suitable for publication by Actuators.

Sincerely.

Best regards,

<corresponding author, Dr. Deming Zhu > et al.

**Academic Editor, Comment # 1:** the manuscript is too long and redundant in several parts. The authors should make an effort to

- remove and summarise the several basic theory that is proposed (such as the general model of a BLDCM)
- remove/shorten the steps for the derivation of equations; the current presentation is more suitable for a undergraduate book rather than a scientific publication;
- reduce the number of plots by condensing them and improve their graphical and content quality, this should be a STRONG improvement;

**Author response:**

The authors thank for the editor's comments, we agree that the editor and we try our best to improve the quality of the submitted paper.

**Author action:**

We updated the manuscript by

- 1) deleting line 105-115, the model of BLDCM.
- 2) removing line 168-173, i.e. part of the simple derivation.
- 3) condensing figures in the revised manuscript and re-picture them for higher quality, such as:

Figure 2 in line 265

Figure 5 in line 422

Figure 7 in line 450-470

Figure 8 & 9 in line 493

Figure 10-12 in line 530-558

---

**Reviewer#1, Comment # 2:** The English writing should be seriously checked and improved.

**Author response:**

The authors thank editor for pointing out that our writing English should be seriously improved. So we have sought for help from MDPI, i.e. English editing service. And hope it will benefit the publication of our manuscript.

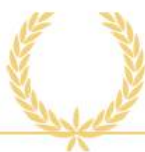

---

We certify that the following article

**A Damp Variable Sliding Mode Control Strategy for Electro-Hydrostatic Actuator**

Mingkang Wang, Yan Wang, Rongrong Yang, Yongling Fu, Deming Zhu \*

has undergone English language editing by MDPI. The text has been checked for correct use of grammar and common technical terms, and edited to a level suitable for reporting research in a scholarly journal.

MDPI uses experienced, native English speaking editors. Full details of the editing service can be found at

► <https://www.mdpi.com/authors/english>.

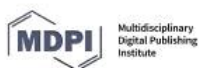

Basel, Switzerland  
December 2020

---

Dr. Shu-Kun Lin  
Publisher & President  
MDPI
